# Supplementary material for: With or without the Mask: Age Differences in Perceived Trustworthiness and Health during the COVID-19 Pandemic
Source: MDPI journal article supplement (doi:10.3390/bs13030195), 2023-02-22
Supplement: s1 [file s1]

# With or without the Mask: Age Differences in Perceived Trustworthiness and Health during the COVID-19 Pandemic

**Table S1.** Items and reliability for the Fear for COVID-19 questionnaire.

| Item                                                                                                 | Subscales                        | Cronbach's Alpha |         |
|------------------------------------------------------------------------------------------------------|----------------------------------|------------------|---------|
|                                                                                                      |                                  | Study 1          | Study 2 |
| I often thought I was infected with the virus                                                        | <b>Belief of contagion</b>       | .765             | .799    |
| I think I could be infected with the virus in the future                                             |                                  |                  |         |
| I think that a dear or close person to me could potentially be infected with the virus               |                                  |                  |         |
| I think that a dear or close person to me could potentially be infected with the virus in the future |                                  |                  |         |
| I think that a person infected with the virus could recover                                          | <b>Consequences of contagion</b> | .809             | .778    |
| I think that a person infected with the virus could die                                              |                                  |                  |         |
| I think it is probable that I would recover after being infected with the virus                      |                                  |                  |         |
| I think that being infected with the virus could be lethal for me                                    |                                  |                  |         |

**Table S2.** Items and reliability of the Lack of trust questionnaire.

| Item                                                               | Cronbach Alpha |
|--------------------------------------------------------------------|----------------|
|                                                                    | Study 1        |
| If given a chance, most people try to take advantage of you.       | .747           |
| Most people are too busy looking out for themselves to be helpful. |                |
| You can't trust stranger anymore.                                  |                |
| I never rely on other people.                                      |                |
| Most people can be trusted.*                                       |                |
| You can't be too careful in dealing with people.                   |                |
| People would try to be fair.*                                      |                |
| Most of the time people try to be helpful.*                        |                |

*Note.* \*reversed items.
